# Supplementary material for: Mediator subunit MDT-15/MED15 and Nuclear Receptor HIZR-1/HNF4 cooperate to regulate toxic metal stress responses in Caenorhabditis elegans
Source: PLoS Genet. 2019 Dec 9;15(12):e1008508. doi: 10.1371/journal.pgen.1008508 (PMC6922464; doi:10.1371/journal.pgen.1008508)
Supplement: S1 Table — (XLSX) [file pgen.1008508.s003.xlsx]

## Sheet: S1 Table
S1 Table. Overlap of genes downregulated in cdk-8(tm1238) mutants and/or mdt-15(tm2182) mutants with genes induced by cadmium.
Overlap cdk-8(tm1238) down - Cd up			Overlap mdt-15(tm2182) down - Cd up			Overlap all 3 conditions
Gene ID	Gene name	Domains/function	Gene ID	Gene name	Domains/function	Gene ID	Gene name
F35E8.11	cdr-1	Lysosomal protein FAXC/Heavy metal response	T10B9.10	cyp-13a7	CYP450 /detoxification	F35E8.11	cdr-1
F37B1.8	gst-19	GST/detoxification	F35E8.11	cdr-1	Lysosomal protein FAXC/Heavy metal response	F37B1.8	gst-19
Y46H3A.3	hsp-16.2	Crystallin alpha A/B (CRYAA/B) /Heast shock response	F15B9.1	far-3	Fatty acid/retinol binding protein/Metabolism	AC3.7	ugt-1
Y46H3A.2	hsp-16.41	Crystallin alpha A/B (CRYAA/B) /Heast shock response	R05F9.5	gst-9	GST/detoxification	F28F8.2	acs-2
T27E4.3	hsp-16.48	Crystallin alpha A/B (CRYAA/B) /Heast shock response	F37B1.8	gst-19	GST/detoxification	T24B8.5
AC3.7	ugt-1	UGT/detoxification	T08G5.10	mtl-2	Metallothionein/Heavy metal response	F42G8.8
B0024.4			F46G10.6	mxl-3	Transcription factor	Y40B10A.6	comt-4
F28F8.2	acs-2	Acyl-CoA-synthetase/Metabolism	K08E7.9	pgp-1	ABCB transporter/detoxification	Y40B10A.7	comt-5
F35E12.8	glb-15	Globin-related, heme/oxygen binding	AC3.7	ugt-1	UGT/detoxification	ZK742.3
T10B9.3			C29F7.2		CHK kinase domain, uncharacterized oxidoreductase dhs-27 domain
T24B8.5		Innate mmune response	F08G5.6	irg-4	Innate mmune response
Y37A1B.5		Ortholog of selenium binding protein SELENBP1	F09B9.1	oac-14	O-Acyl transfwerase/metabolism
Y39B6A.24	asp-17	Aspartic-type endopeptidase	F14F7.2	cyp-13a11	CYP450 /detoxification
Y47H10A.5		Predicted to have RAI-like family domain	F28F8.2	acs-2	Acyl-CoA-synthetase/Metabolism	Gene was validated by qRT-PCR in Taubert et al. PLoS Genetics 2008
F08F8.5	numr-1	Nuclear localized metal responsive/Heavy metal response	R04D3.1	cyp-14A4	CYP450 /detoxification
F42G8.8		Protein phosphatase 3 catalytic subunit (PPP3PC)	T08G5.1
F52E1.5		Innate mmune response	T16G1.6		CHK kinase domain, uncharacterized oxidoreductase dhs-27 domain
Y40B10A.6	comt-4	Catechol-O-methyltransferase	T24B8.5		Innate mmune response
Y40B10A.7	comt-5	Catechol-O-methyltransferase	C06E4.3		Predicted short chain dehydrogenase (HSD17B14)/detoxification
Y58A7A.5			C25H3.10		F-Box protein
ZK742.3		Predicted to have FMN binding activity and oxidoreductase activity.	F10D2.11	ugt-41	UGT/detoxification
			F13H6.3		Predicted carboxyic ester hydrolase/metabolism
			F15E6.8	dct-7	daf-16 controlled, germline-tumor affecting
			F15E11.1	pud-2.1	Protein upregulated in daf-2(gf)
			F15E11.12	pud-4	Protein upregulated in daf-2(gf)
			F15E11.15	pud-3
			F42G8.8		Protein phosphatase 3 catalytic subunit (PPP3PC)
			F45D11.1
			F45D11.4
			F59B1.8		Innate mmune response
			T28D9.3	plpp-1.2	Phospholipid phosphatase 1/2/3 (PPLP1/2/3)
			Y19D10B.7	pud-1.2	Protein upregulated in daf-2(gf)
			Y40B10A.6	comt-4	Catechol-O-methyltransferase
			Y40B10A.7	comt-5	Catechol-O-methyltransferase
			Y73C8C.2	clec-210	C-type lectin/Innate immune response
			ZK742.3		Predicted to have FMN binding activity and oxidoreductase activity.
